# Supplementary material for: Home spirometry utilisation in telemedicine clinic for cystic fibrosis care during COVID-19 pandemic: a quality improvement process
Source: PubMed Central journal article supplement — BMJ Open Qual. 2021 Aug 25;10(3):e001529. doi: 10.1136/bmjoq-2021-001529 (PMC8390143; doi:10.1136/bmjoq-2021-001529), 2021-08-25
Supplement: bmjoq-2021-001529supp001.pdf [file bmjoq-2021-001529supp001.pdf]

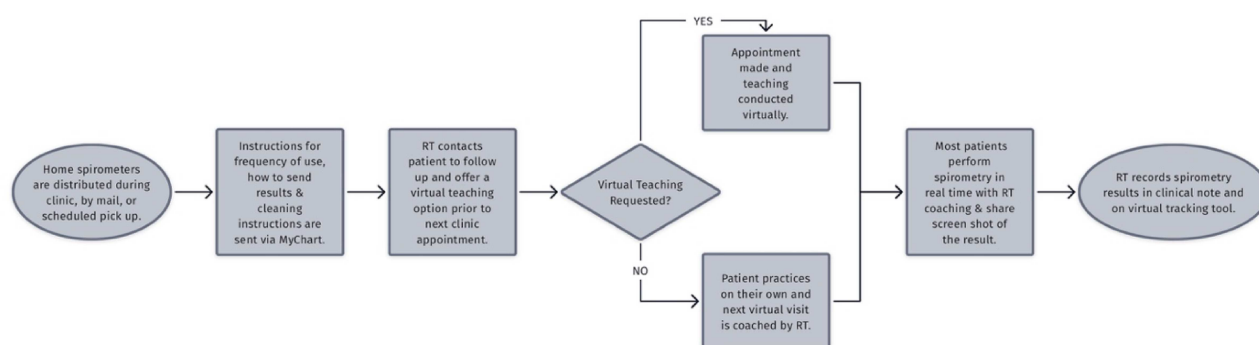

Image 1: Process map for distribution and use of home spirometers; RT=respiratory therapist. The process map was developed by UVA CF team.
