# Supplementary material for: Home spirometry utilisation in telemedicine clinic for cystic fibrosis care during COVID-19 pandemic: a quality improvement process
Source: PubMed Central journal article supplement — BMJ Open Qual. 2021 Aug 25;10(3):e001529. doi: 10.1136/bmjoq-2021-001529 (PMC8390143; doi:10.1136/bmjoq-2021-001529), 2021-08-25
Supplement: bmjoq-2021-001529supp003.pdf [file bmjoq-2021-001529supp003.pdf]

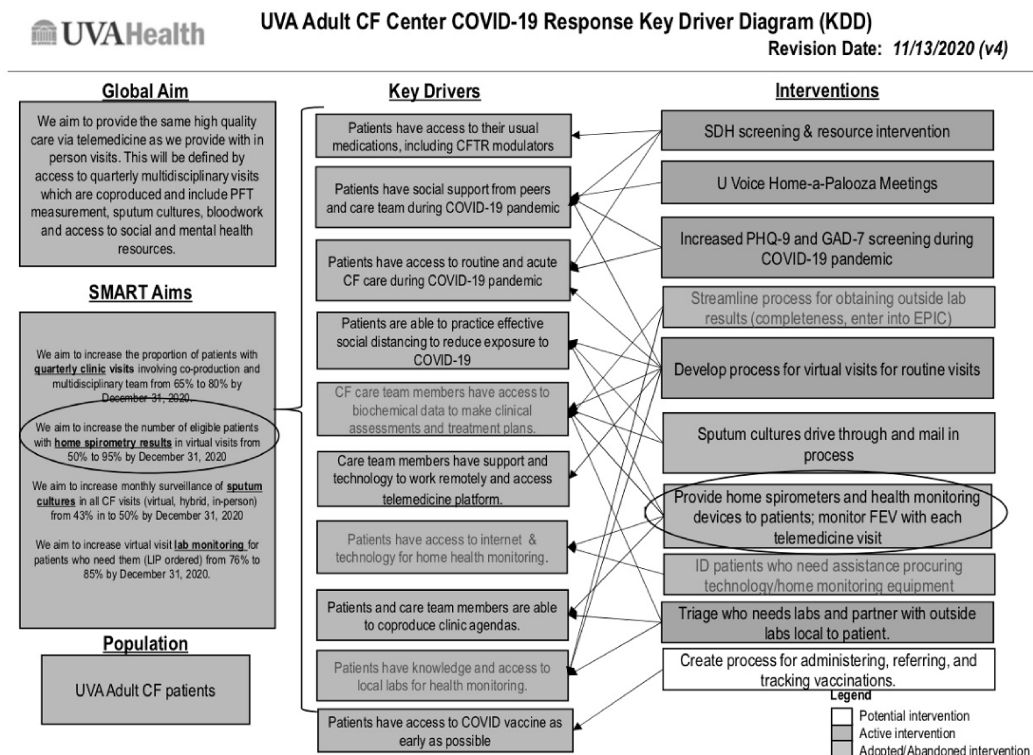

Image 3. UVA Adult CF Center COVID-19 response KDD; The specific aim and intervention pertinent to this QI project report are circled. UVA=University of Virginia, CF=Cystic Fibrosis, KDD=Key Driver Diagram, CFTR=cystic fibrosis transmembrane regulator, SDH=social determinants of health, FEV<sub>1</sub>=forced expiratory volume in one second. KDD was adapted from Cincinnati Children’s Hospital Medical center.
